# Supplementary material
Source: ML conference proceedings conference paper supplement (https://openreview.net/forum?id=898RcRYWCg)
Supplement: supplementary_material [file attachment]

---

# Tame a Wild Camera: In-the-Wild Monocular Camera Calibration ===== Supplementary =====

---

**Shengjie Zhu, Abhinav Kumar, Masa Hu, and Xiaoming Liu**  
 Department of Computer Science and Engineering,  
 Michigan State University, East Lansing, MI, 48824  
 {zhusheng, kumarab6, huynshen}@msu.edu, liuxm@cse.msu.edu

## 1 Restore Cropping and Resizing without the Original Intrinsic

In the main paper Sec. 3.6, when the original intrinsic is unknown, we restore the modified image by defining an inverse operation  $\Delta\mathbf{K}$  to restore  $\mathbf{K}'$  to an intrinsic follow the simple camera assumption. Suppose the input image  $\mathbf{I}'$  of size  $(w \times h)$ , we apply monocular camera calibration to estimate its intrinsic as  $\mathbf{K}'$ . We introduce the reverse operation as:

$$\mathbf{K}' = \begin{bmatrix} f'_x & 0 & b'_x \\ 0 & f'_y & b'_y \\ 0 & 0 & 1 \end{bmatrix}, \Delta\mathbf{K}_f = \begin{bmatrix} 1 & 0 & 0 \\ 0 & f'_x/f'_y & 0 \\ 0 & 0 & 1 \end{bmatrix}, \Delta\mathbf{K}_b = \begin{bmatrix} 1 & 0 & \Delta b_x \\ 0 & 1 & \Delta b_y \\ 0 & 0 & 1 \end{bmatrix}. \quad (1)$$

Set  $r' = f'_x/f'_y$ , the  $\Delta b'_x$  and  $\Delta b'_y$  are conditioned as:

$$\Delta b_x = \begin{cases} 0, & \text{if } b'_x \geq w - b'_x \\ w - 2b'_x, & \text{otherwise} \end{cases}, \quad \Delta b_y = \begin{cases} 0, & \text{if } b'_y \geq h - b'_y \\ r' \cdot (h - 2b'_y), & \text{otherwise} \end{cases}. \quad (2)$$

The restoration operation is defined as  $\Delta\mathbf{K} = \Delta\mathbf{K}_b\Delta\mathbf{K}_f$ . After the restoration, the width of the new image is  $w' = 2 \max(w - b'_x, b'_x)$  and the height of the new image is  $h' = 2r' \max(h - b'_y, b'_y)$ . An illustration depicting the restoration process is presented in Fig. 1.

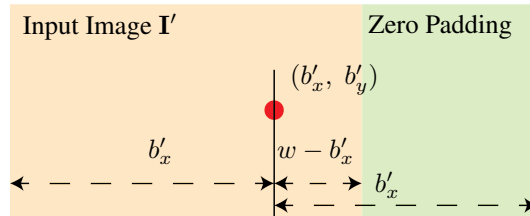

**Figure 1:** We illustrate the construction of  $\Delta\mathbf{K}_b$  when  $b'_x \geq w - b'_x$ . We mark the focal point using a red dot. To position the focal point at the center of the image, we pad the right side of the images with zeros. When padding is applied to the right side of the image, the origin of the 2D image coordinate system remains unchanged. Therefore, we set  $b'_x$  to be 0. Conversely, when padding is applied to the left of the image, we must assign a non-zero value to  $b'_x$  in order to account for the shift in image coordinates.

## 2 Experiments

### 2.1 In-the-Wild Monocular Camera Calibration

**Train, Validation, and Test Split.** We randomly sample 800 images from the training set to formulate the validation split. For SUN3D, MVS, Scenes11, and RGBD, we follow [23]. For

**Table 1: Dataset Statistics.** We document the intrinsic, focal point, and camera FoV (in degree) in the table. The upper and lower part suggests seen and unseen datasets during training. [**Key:** Syn. = Synthesized]

| Dataset         | Calibration | Scene     | Syn. | $f_x$   | $f_y$   | $b_x$   | $b_y$  | $w$               | $h$  | FoV <sub>x</sub> | FoV <sub>y</sub> |
|-----------------|-------------|-----------|------|---------|---------|---------|--------|-------------------|------|------------------|------------------|
| NuScenes [5]    | Calibrated  | Driving   | ✓    | 1266.42 | 1266.42 | 816.27  | 491.51 | 1600              | 900  | 64.56            | 39.12            |
| KITTI [11]      | Calibrated  | Driving   | ✓    | 718.86  | 718.86  | 607.19  | 185.22 | 1241              | 376  | 81.60            | 29.31            |
| Cityscapes [7]  | Calibrated  | Driving   | ✓    | 2267.86 | 2230.28 | 1045.53 | 518.88 | 2048              | 1024 | 48.60            | 25.86            |
| NYUv2 [17]      | Calibrated  | Indoor    | ✓    | 518.85  | 519.47  | 325.58  | 253.74 | 640               | 480  | 63.33            | 49.59            |
| SUN3D [24]      | Calibrated  | Indoor    | ✓    | 570.34  | 570.32  | 320.00  | 240.00 | 640               | 480  | 58.59            | 45.64            |
| ARKitScenes [3] | Calibrated  | Indoor    | ✓    | 1601.95 | 1601.95 | 936.55  | 709.61 | 1920              | 1440 | 62.15            | 48.65            |
| Objectron [1]   | Calibrated  | Object    | ✓    | 1579.18 | 1579.18 | 721.01  | 934.70 | 1440              | 1920 | 48.53            | 62.01            |
| MVImgNet [25]   | SfM         | Object    | ✓    |         |         |         |        | Varying Intrinsic |      |                  |                  |
| MegaDepth [16]  | SfM         | Outdoor   | ✗    |         |         |         |        | Varying Intrinsic |      |                  |                  |
| Waymo [20]      | Calibrated  | Driving   | ✗    | 2060.56 | 2060.56 | 947.46  | 634.37 | 1920              | 1280 | 49.73            | 34.34            |
| RGBD [18]       | Pre-defined | Indoor    | ✗    | 570.00  | 570.00  | 320.00  | 240.00 | 640               | 480  | 58.62            | 45.67            |
| ScanNet [8]     | Calibrated  | Indoor    | ✗    | 1165.72 | 1165.74 | 649.09  | 484.77 | 1296              | 968  | 58.30            | 45.33            |
| MVS [10]        | Pre-defined | Hybrid    | ✗    | 570.34  | 570.34  | 320.00  | 240.00 | 640               | 480  | 58.59            | 45.64            |
| Scenes11 [6]    | Pre-defined | Synthetic | ✗    | 570.00  | 570.00  | 320.00  | 240.00 | 640               | 480  | 58.62            | 45.67            |

ScanNet and MegaDepth, we follow [27]. For ARKitScenes and Objectron, we follow [4]. For NuScenes, CityScapes, and Waymo, we follow the official train split and use the validation as the test split. For KITTI, we use the sequences collected in date “2011\_10\_03” as testing split and others as training split. For MVImgNet, we use the “MVImgNet\_42.zip” for testing and the first 4 zip files for training. For NYUv2, we follow [22]. To address the excessive image counts in certain test splits, we randomly downsample each dataset’s test set to 800 images. Note, since SUN3D, MVS, Scenes11, and RGBD only contain 160 images, we include all of them as the testing set.

**Intrinsic Documentation.** In Tab. 1, we record the intrinsic of training and testing data without augmentation. Many datasets in Tab. 1, such as the KITTI dataset, conduct calibration multiple times, leading to slight variations in their intrinsic. Since the difference is minor, we opt to record the intrinsic of the first test sample for each dataset.

MegaDepth gathers images captured by diverse imaging devices from the internet, resulting in a wide range of intrinsic. We denote this specific scenario with the term “Varying Intrinsic”. For MVImgNet, while it is generated using SfM similar to MegaDepth, its images are collected with a single type of camera. Therefore, while we document its intrinsic as “Varying Intrinsic”, we still apply augmentation. In MVImgNet and Objectron datasets, which emphasize object-centric images, augmentations have a tendency to remove foreground objects, leaving behind textureless backgrounds. To prevent this, we reduce the augmentation by 1/5 compared to other synthetic datasets.

**Training and Testing Intrinsic Distribution.** In Fig. 2, we plot the training and testing set intrinsic distribution of the seen datasets, *i.e.*, the upper half of Tab. 1. We use camera FoV as a normalized measurement to indicate intrinsic variations. Since we include image cropping during synthesis, we introduce a generalized camera FoV for cropped images, defined as:

$$\text{FoV}_x = \arctan\left(\frac{w - b_x}{f_x}\right) - \arctan\left(\frac{0 - b_x}{f_x}\right), \quad \text{FoV}_y = \arctan\left(\frac{h - b_y}{f_y}\right) - \arctan\left(\frac{0 - b_y}{f_y}\right). \quad (3)$$

We report the FoV distributions in Fig. 2. From Fig. 2, MegaDepth (marked in brown dots) gathers images captured by diverse imaging devices from the Internet, resulting in a wide range of intrinsic. The large variation of MegaDepth intrinsic makes it an ideal dataset for benchmarking monocular camera calibration. In the main paper Tab. 2, our method achieves superior performance on MegaDepth dataset. This further validates the generalization capability of our method.

In Fig. 2, we also compare our experimental setting with our baselines [12–15]. Our baselines set up the experiment (main paper Tab. 3) on a single dataset GSV using synthesized images with FoV ranging from 40° to 80°. Since they assume identical FoV for image axis X and Y directions, their FoV distribution is represented by a Red Line. From Fig. 2, our experiments include images collected from multiple datasets with diverse augmentation. This makes our experiments far more challenging and comprehensive compared to the baselines.

**In-the-Wild Monocular Calibration without SUN3D dataset.** In Tab. 1, for indoor datasets SUN3D, RGBD, Scenes11, and hybrid datasets MVS, they share a similar intrinsic. But each of them is captured with different devices. SUN3D is collected with SUSXtion PRO LIVE [21]. RGBD uses Microsoft Kinect [26]. Scenes11 uses synthetically generated images [23]. The MVS dataset

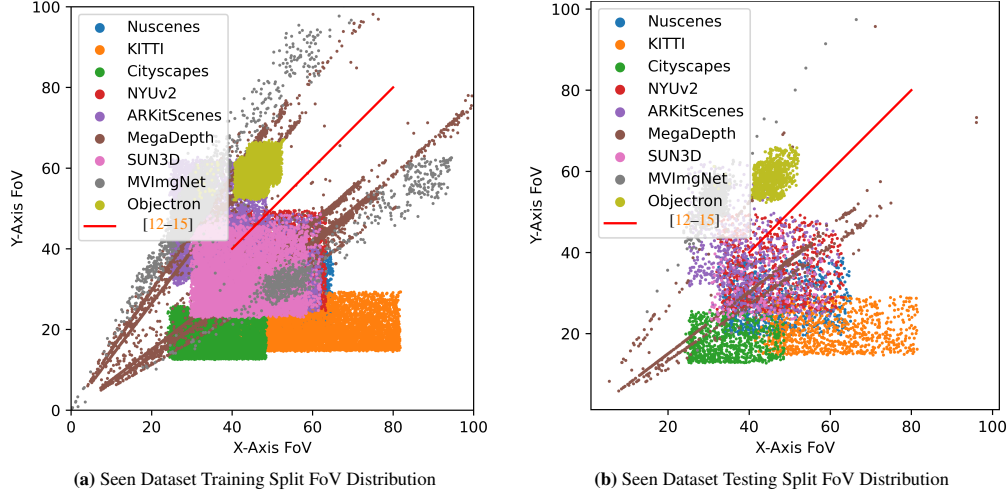

**Figure 2:** We plot the Camera FoV distribution of the seen dataset training and testing split. We compare it to the experimental setting with our baseline works [12–15]. The baselines synthesize images with the FoV ranging between  $40^\circ$  to  $80^\circ$  on the GSV dataset [2] only (main paper Tab. 3). Since [12–15] assume identical camera FoV on image axis X and Y direction, their FoV distribution is represented by the single **Red Line**. In contrast, we adopt a significantly more challenging and comprehensive experimental setting. We synthesize images over multiple datasets without an assumption of identical camera FoV. Further, we include cropping in the synthesis. Combining both points, our training and testing data possess a diverse FoV distribution. Additionally, a small FoV is in general more challenging for calibration since the distortion from camera projection is minor at a small FoV. Our experiments contain diverse small FoVs compared to baselines. During plotting, we compute a generalized camera FoV if the image is cropped defined in Eq. (3).

**Table 2: In-the-Wild Monocular Camera Calibration Excludes SUN3D Dataset.** We repeat the main paper Tab. 2 experiment after excluding the SUN3D dataset in training. The exclusion of SUN3D dataset does not change the conclusion. We use  $\downarrow$  and  $\uparrow$  to indicate an improved and inferior performance compared to the main paper Tab. 2. [Key: ZS = Zero-Shot, Asm. = Assumptions, Syn. = Synthesized]

| Dataset         | Calibration | Scene     | ZS           | Syn.         | Perspective [13] |              | Ours                      |              | Ours + Asm.               |              |
|-----------------|-------------|-----------|--------------|--------------|------------------|--------------|---------------------------|--------------|---------------------------|--------------|
|                 |             |           |              |              | $e_f$            | $e_b$        | $e_f$                     | $e_b$        | $e_f$                     | $e_b$        |
| NuScenes [5]    | Calibrated  | Driving   | $\times$     | $\checkmark$ | 0.610            | 0.248        | <b>0.066</b> $\downarrow$ | <b>0.082</b> | 0.372                     | 0.400        |
| KITTI [11]      | Calibrated  | Driving   | $\times$     | $\checkmark$ | 0.670            | 0.221        | <b>0.081</b> $\downarrow$ | <b>0.113</b> | 0.420                     | 0.368        |
| Cityscapes [7]  | Calibrated  | Driving   | $\times$     | $\checkmark$ | 0.713            | 0.334        | <b>0.074</b> $\downarrow$ | <b>0.081</b> | 0.383                     | 0.367        |
| NYUv2 [17]      | Calibrated  | Indoor    | $\times$     | $\checkmark$ | 0.449            | 0.409        | <b>0.076</b> $\downarrow$ | <b>0.163</b> | 0.332                     | 0.379        |
| ARKitScenes [3] | Calibrated  | Indoor    | $\times$     | $\checkmark$ | 0.362            | 0.410        | <b>0.085</b> $\downarrow$ | <b>0.164</b> | 0.338                     | 0.377        |
| MVImgNet [25]   | SfM         | Object    | $\times$     | $\checkmark$ | 0.204            | 0.500        | <b>0.074</b> $\downarrow$ | <b>0.065</b> | 0.085                     | 0.072        |
| Objectron [1]   | Calibrated  | Object    | $\times$     | $\checkmark$ | 0.178            | 0.339        | <b>0.054</b> $\downarrow$ | <b>0.069</b> | 0.063                     | 0.079        |
| MegaDepth [16]  | SfM         | Outdoor   | $\times$     | $\times$     | 0.493            | <b>0.000</b> | 0.138                     | 0.056        | <b>0.112</b> $\uparrow$   | <b>0.000</b> |
| SUN3D [24]      | Calibrated  | Indoor    | $\checkmark$ | $\times$     | 0.260            | 0.271        | 0.094                     | 0.051        | <b>0.086</b>              | <b>0.000</b> |
| Waymo [20]      | Calibrated  | Driving   | $\checkmark$ | $\times$     | 0.564            | <b>0.020</b> | 0.199                     | 0.030        | <b>0.150</b> $\downarrow$ | <b>0.020</b> |
| RGBD [18]       | Pre-defined | Indoor    | $\checkmark$ | $\times$     | 0.264            | <b>0.000</b> | 0.136                     | 0.058        | <b>0.103</b> $\uparrow$   | <b>0.000</b> |
| ScanNet [8]     | Calibrated  | Indoor    | $\checkmark$ | $\times$     | 0.385            | <b>0.010</b> | 0.169                     | 0.020        | <b>0.150</b> $\uparrow$   | <b>0.010</b> |
| MVS [10]        | Pre-defined | Indoor    | $\checkmark$ | $\times$     | 0.312            | <b>0.000</b> | 0.198                     | 0.027        | <b>0.130</b> $\uparrow$   | <b>0.000</b> |
| Scenes11 [6]    | Pre-defined | Synthetic | $\checkmark$ | $\times$     | 0.348            | <b>0.000</b> | 0.196                     | 0.038        | <b>0.157</b> $\uparrow$   | <b>0.000</b> |

comprises a combination of default downsampled high-resolution images from COLMAP and images captured using cellphones [23]. ScanNet shares a similar camera FoV. But ScanNet is collected with an iPad camera [8]. The problem arises as we include the SUN3D dataset in our training set. However, since one of the objectives of this research is to provide a beneficial model for other researchers, it is reasonable to incorporate a widely adopted intrinsic pattern. Despite it, people may still question whether the inclusion of SUN3D decisively influences the zero-shot performance of unseen datasets RGBD, Scenes11, MVS, and ScanNet, since the intrinsic has been seen during training. We answer this question via re-experimenting the main paper Tab. 2 after excluding the SUN3D.

We report the results in Tab. 2. From Tab. 2, the exclusion of SUN3D leads to improved performance on Waymo and inferior performance on RGBD, Scenes11, MVS, and ScanNet datasets. This suggests the inclusion of SUN3D helps generalize datasets with similar intrinsic values. One interesting discovery is that the removal of SUN3D consistently results in improvements across synthetic datasets. We interpret this as an indication that SUN3D exhibits a distinct distribution in comparison

**Table 3: In-the-Wild Monocular Camera Calibration with Augmentation.** We synthesize novel zero-shot intrinsic with augmentation following main paper Sec. 4.1 to the **unseen** dataset. We add new results to the last 5 rows of the table. The rest of the table is identical to the main paper Tab. 2. Note, synthesis breaks the simple camera assumption. Fig. 4 to Fig. 8 visualize the intrinsic estimation of the last 5 rows via applying same augmentation. [Key: ZS = Zero-Shot, Asm. = Assumptions, Syn. = Synthesized]

| Dataset         | Calibration | Scene     | ZS | Syn. | Perspective [13] |              | Ours         |              | Ours + Asm.  |              |
|-----------------|-------------|-----------|----|------|------------------|--------------|--------------|--------------|--------------|--------------|
|                 |             |           |    |      | $e_f$            | $e_b$        | $e_f$        | $e_b$        | $e_f$        | $e_b$        |
| NuScenes [5]    | Calibrated  | Driving   | ✗  | ✓    | 0.610            | 0.248        | <b>0.102</b> | <b>0.087</b> | 0.402        | 0.400        |
| KITTI [11]      | Calibrated  | Driving   | ✗  | ✓    | 0.670            | 0.221        | <b>0.111</b> | <b>0.078</b> | 0.383        | 0.368        |
| Cityscapes [7]  | Calibrated  | Driving   | ✗  | ✓    | 0.713            | 0.334        | <b>0.108</b> | <b>0.110</b> | 0.387        | 0.367        |
| NYUv2 [17]      | Calibrated  | Indoor    | ✗  | ✓    | 0.449            | 0.409        | <b>0.086</b> | <b>0.174</b> | 0.376        | 0.379        |
| ARKitScenes [3] | Calibrated  | Indoor    | ✗  | ✓    | 0.362            | 0.410        | <b>0.140</b> | <b>0.243</b> | 0.400        | 0.377        |
| SUN3D [24]      | Calibrated  | Indoor    | ✗  | ✓    | 0.442            | 0.501        | <b>0.113</b> | <b>0.205</b> | 0.389        | 0.383        |
| MVImgNet [25]   | SfM         | Object    | ✗  | ✓    | 0.204            | 0.500        | <b>0.101</b> | <b>0.081</b> | 0.108        | 0.072        |
| Objectron [1]   | Label       | Object    | ✗  | ✓    | 0.178            | 0.339        | <b>0.078</b> | <b>0.070</b> | 0.088        | 0.079        |
| MegaDepth [16]  | SfM         | Outdoor   | ✗  | ✗    | 0.493            | <b>0.000</b> | 0.137        | 0.046        | <b>0.109</b> | <b>0.000</b> |
| Waymo [20]      | Calibrated  | Driving   | ✓  | ✗    | 0.564            | <b>0.020</b> | 0.210        | 0.053        | <b>0.157</b> | <b>0.020</b> |
| RGBD [18]       | Pre-defined | Indoor    | ✓  | ✗    | 0.264            | <b>0.000</b> | 0.097        | 0.039        | <b>0.067</b> | <b>0.000</b> |
| ScanNet [8]     | Calibrated  | Indoor    | ✓  | ✗    | 0.385            | <b>0.010</b> | 0.128        | 0.041        | <b>0.109</b> | <b>0.010</b> |
| MVS [10]        | Pre-defined | Indoor    | ✓  | ✗    | 0.312            | <b>0.000</b> | 0.170        | 0.028        | <b>0.127</b> | <b>0.000</b> |
| Scenes11 [6]    | Pre-defined | Synthetic | ✓  | ✗    | 0.348            | <b>0.000</b> | 0.170        | 0.044        | <b>0.117</b> | <b>0.000</b> |
| Waymo [20]      | Calibrated  | Driving   | ✓  | ✓    | 0.655            | 0.266        | <b>0.210</b> | <b>0.158</b> | 0.385        | 0.381        |
| RGBD [18]       | Pre-defined | Indoor    | ✓  | ✓    | 0.352            | 0.453        | <b>0.129</b> | <b>0.286</b> | 0.345        | 0.339        |
| ScanNet [8]     | Calibrated  | Indoor    | ✓  | ✓    | 0.480            | 0.496        | <b>0.126</b> | <b>0.246</b> | 0.367        | 0.365        |
| MVS [10]        | Pre-defined | Indoor    | ✓  | ✓    | 0.437            | 0.454        | <b>0.163</b> | <b>0.281</b> | 0.290        | 0.349        |
| Scenes11 [6]    | Pre-defined | Synthetic | ✓  | ✓    | 0.451            | 0.445        | <b>0.168</b> | <b>0.410</b> | 0.381        | 0.383        |

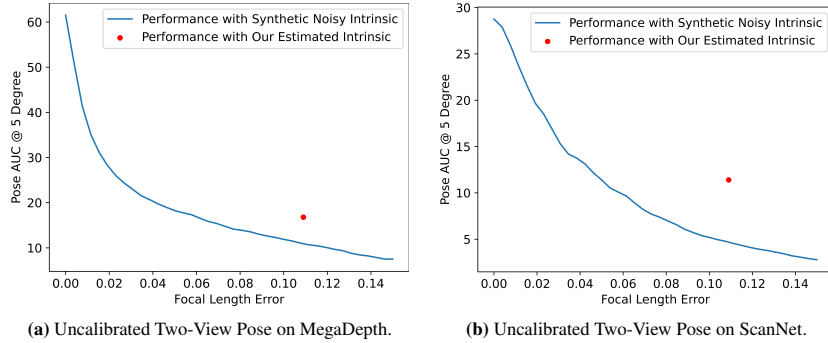

**Figure 3:** We visualize the performance of uncalibrated two-view pose estimation with respect to the monocular camera calibration error  $e_f$ . The steep curve indicates that uncalibrated two-view pose estimation is a challenging problem. The red dot marks pose performance using our estimated intrinsic as reported in main paper Tab. 6.

to other training datasets. As a result, fitting the training distribution becomes easier, while fitting the testing distribution becomes more challenging. Considering the analysis provided above, it is considered reasonable to include the SUN3D dataset.

**In-the-Wild Monocular Calibration with Augmentation.** From Tab. 3, we synthesize novel intrinsic to **unseen** datasets following the augmentation defined in the main paper Sec. 4.1. Following main paper Sec. 3.6, the quality of the intrinsic can be assessed using the bounding box. In Fig. 4 to Fig. 8, we apply the same augmentation as Tab. 3 and visualize the intrinsic quality with bounding boxes. From Tab. 3, our focal length estimation shows superior robustness since the error  $e_f$  remains consistent to the result without augmentation. Our focal point error  $e_b$  goes up. However, in real-world applications, we consider the focal point error  $e_b$  to be of lesser concern. Assuming a simple camera model naturally removes the focal point error  $e_b$ . In Tab. 3, we apply extensive augmentation, which breaks the simple camera assumption. But the assumption holds true in most real-world applications. Further, it is expected to have a high focal point error  $e_b$ . From Fig. 4 to Fig. 8, the focal length error  $e_f$  indicates the correct restoration of the image aspect ratio. The focal point error  $e_b$  indicates the accurate restoration of the cropping location. Intuitively, accurately locating the cropped area is a challenging task when applied to in-the-wild images. Meanwhile, as observed from Fig. 4 to Fig. 8, our model still relatively accurately locates the cropped area.



### 3 Downstream Applications

**Uncalibrated Two-View Camera Pose Estimation.** Fig. 3 plots the uncalibrated two-view camera pose estimation performance *w.r.t.* increasingly noisy intrinsic. We follow a naive way to synthesize noise into intrinsic:

$$f'_x = (1 + c \cdot e_f) \cdot f_x, \quad f'_y = (1 + c \cdot e_f) \cdot f_y, \quad (4)$$

where  $c$  is a random sign whose value is either 1 or  $-1$ . Variable  $f'_x$ ,  $f'_y$ ,  $f_x$ , and  $f_y$  are noisy and groundtruth focal length in axis X and Y respectively. From Fig. 3, the uncalibrated pose performance is highly sensitive to intrinsic noise, suggesting itself a challenging problem. Just as the geometric matching community [9, 19, 27] employs two-view pose estimation to assess the quality of correspondences, uncalibrated two-view pose estimation can also be utilized to evaluate the quality of intrinsic parameter estimation.

**Additional Image Cropping and Resizing Restoration Results.** We visualize the unseen ScanNet, Waymo, RGBD, MVS, and Scenes11 datasets in Fig. 4, Fig. 5, Fig. 6, Fig. 7, and Fig. 8 respectively.

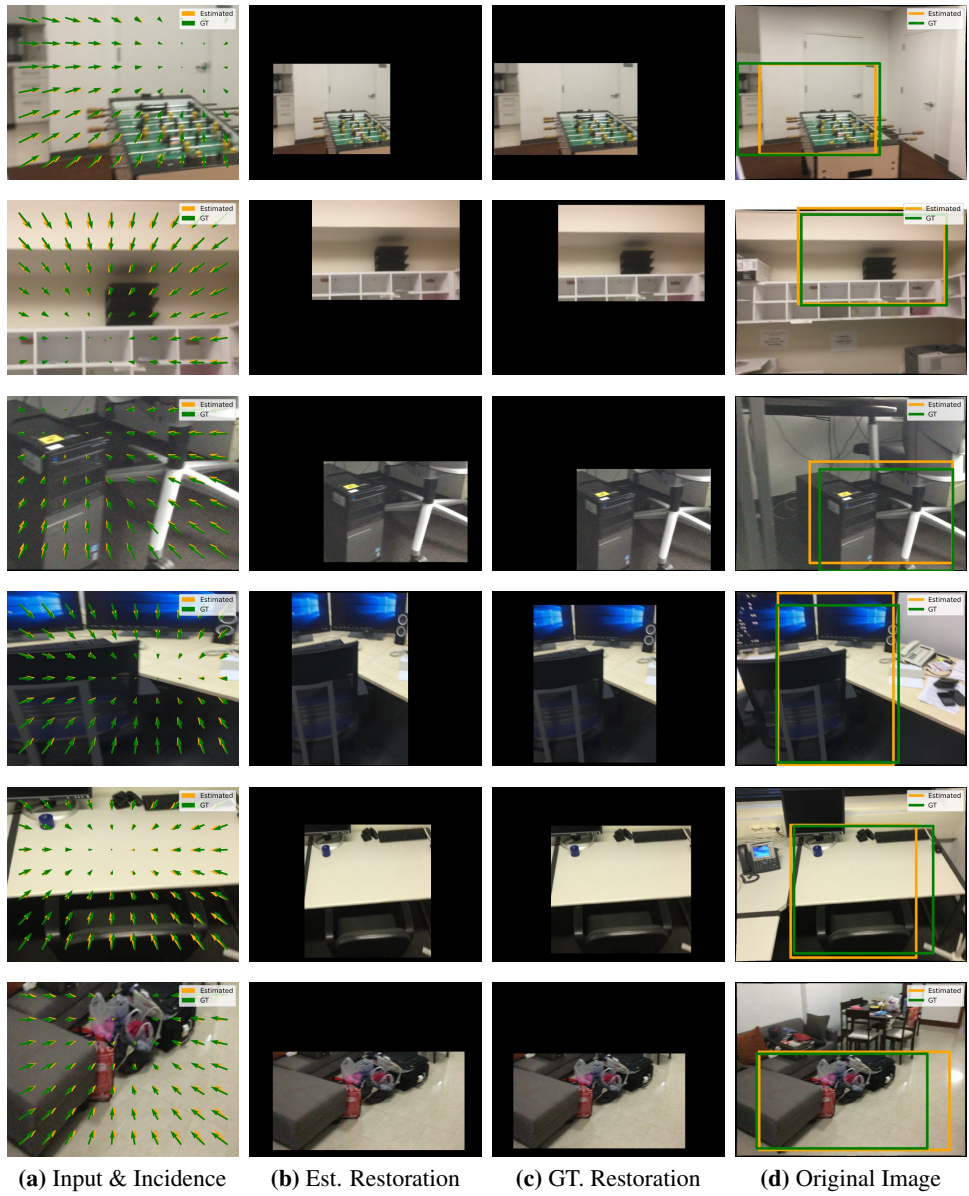

**Figure 4: Image Crop & Resize Detection and Restoration Visualization on ScanNet.**

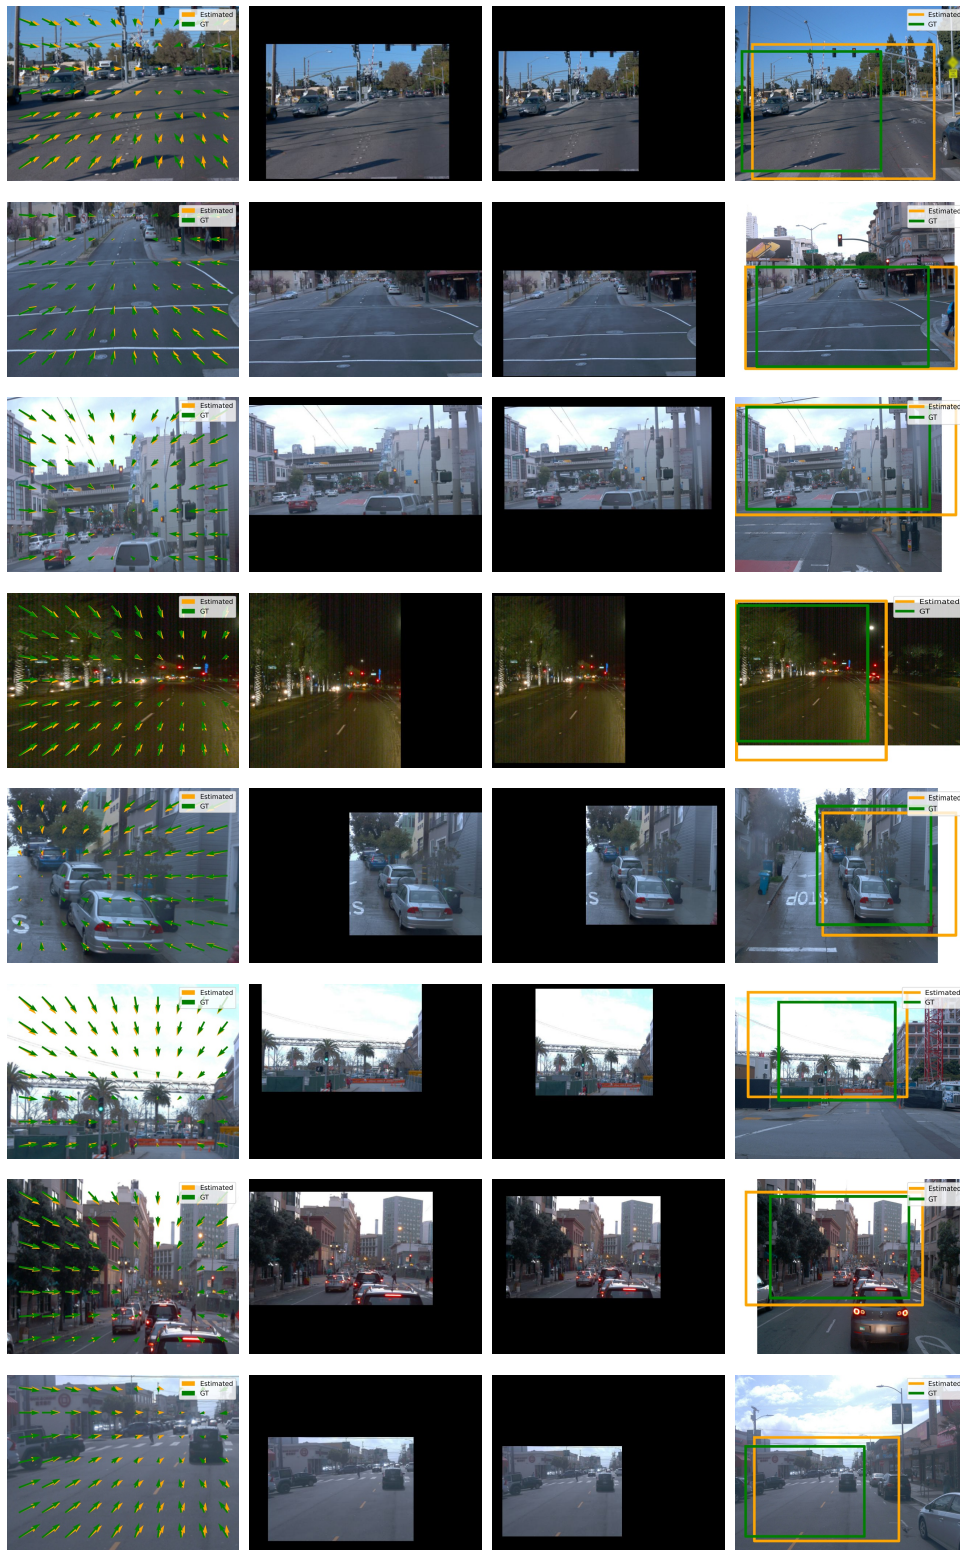

(a) Input & Incidence      (b) Est. Restoration      (c) GT. Restoration      (d) Original Image

**Figure 5: Image Crop & Resize Detection and Restoration Visualization on Waymo.**



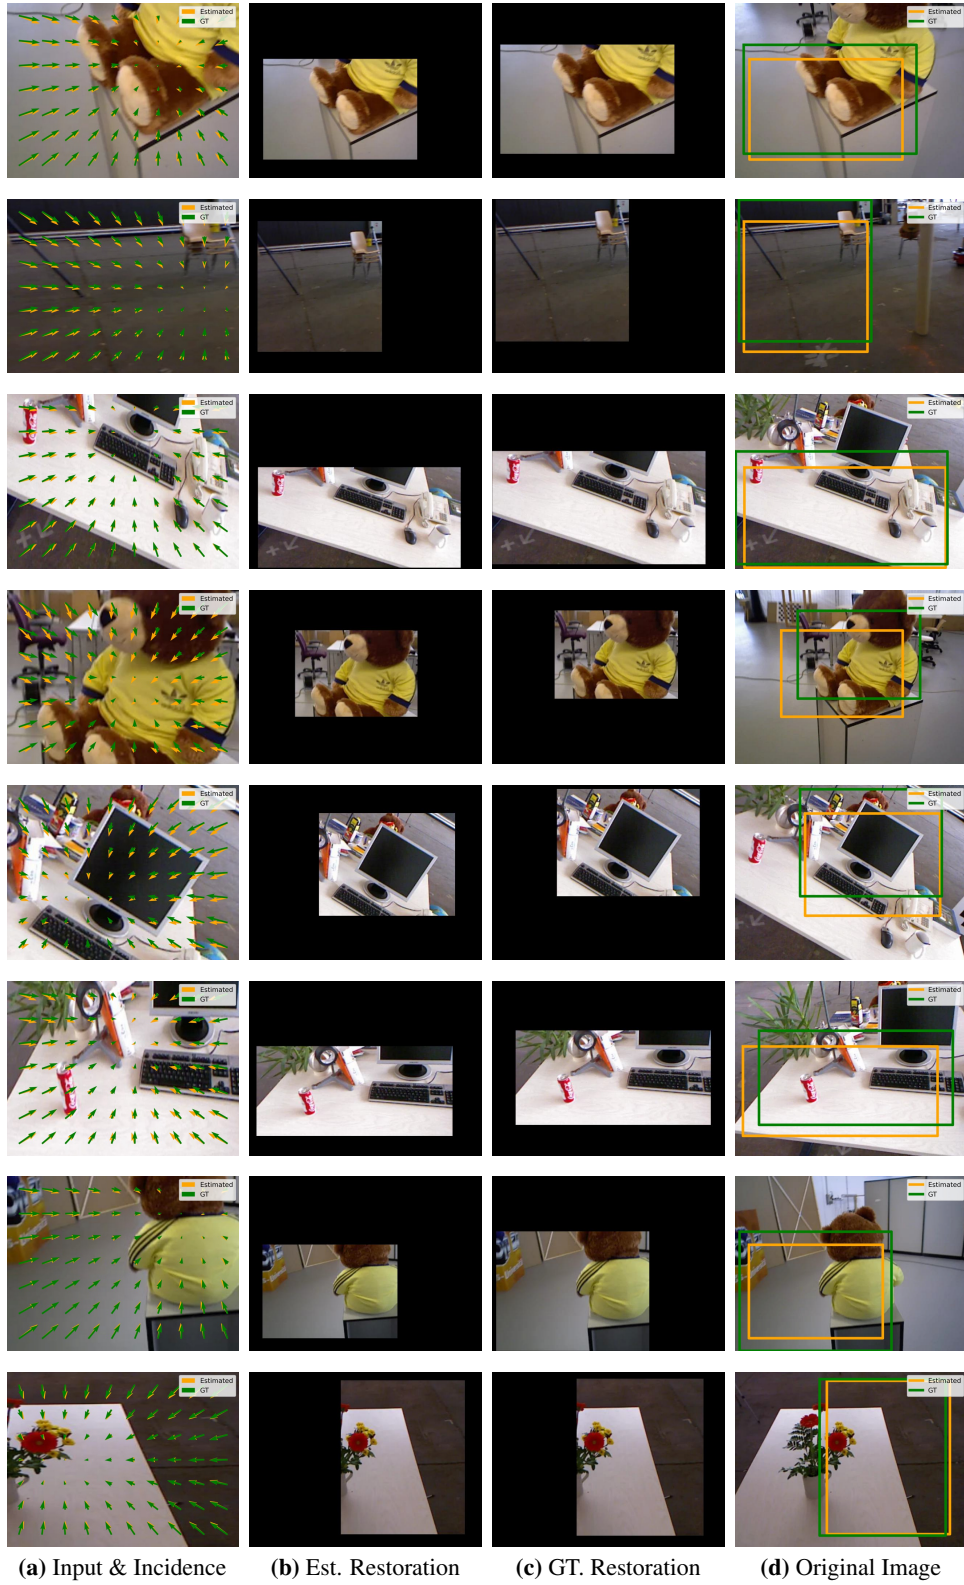

**Figure 6: Image Crop & Resize Detection and Restoration Visualization on RGBD.** There exists overall image content due to the testing split only containing 160 images with overlapping content.

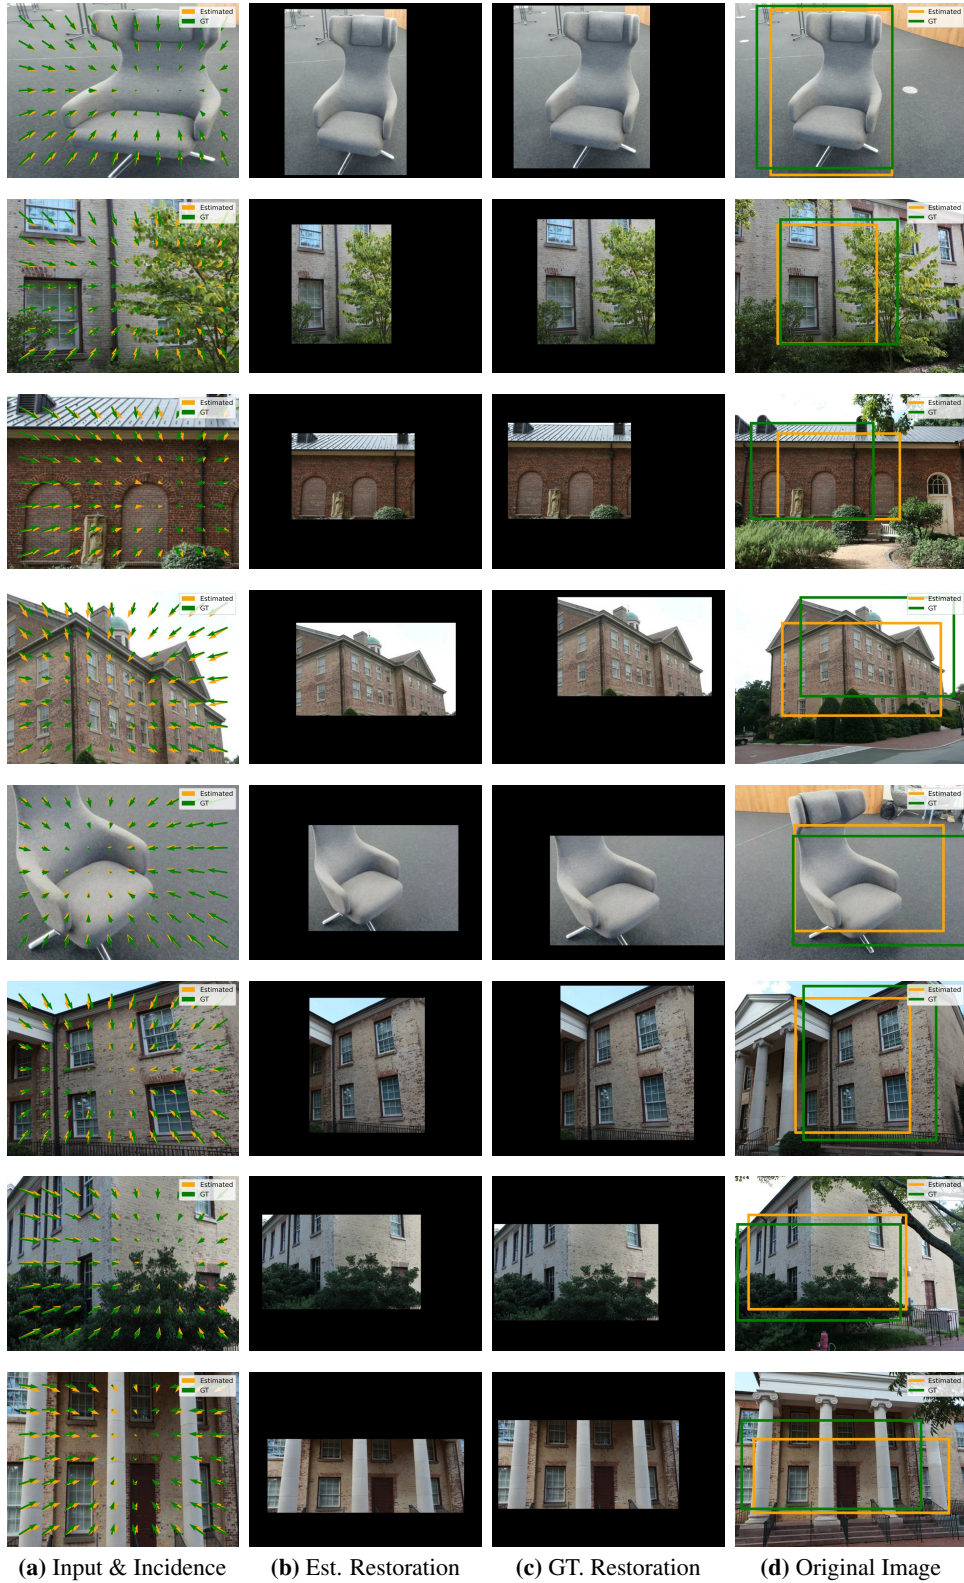

**Figure 7: Image Crop & Resize Detection and Restoration Visualization on MVS.** There exists overall image content due to the testing split only containing 160 images with overlapping content.







## References

- [1] Adel Ahmadyan, Liangkai Zhang, Artsiom Ablavatski, Jianing Wei, and Matthias Grundmann. Objectron: A large scale dataset of object-centric videos in the wild with pose annotations. In *CVPR*, 2021. 2, 3, 4
- [2] Dragomir Anguelov, Carole Dulong, Daniel Filip, Christian Frueh, Stéphane Lafon, Richard Lyon, Abhijit Ogale, Luc Vincent, and Josh Weaver. Google street view: Capturing the world at street level. *Computer*, 2010. 3
- [3] Gilad Baruch, Zhuoyuan Chen, Afshin Dehghan, Tal Dimry, Yuri Feigin, Peter Fu, Thomas Gebauer, Brandon Joffe, Daniel Kurz, Arik Schwartz, and Elad Shulman. ARKitScenes - a diverse real-world dataset for 3D indoor scene understanding using mobile RGB-D data. In *NeurIPS Datasets and Benchmarks Track*, 2021. 2, 3, 4
- [4] Garrick Brazil, Abhinav Kumar, Julian Straub, Nikhila Ravi, Justin Johnson, and Georgia Gkioxari. Omni3D: A large benchmark and model for 3D object detection in the wild. In *CVPR*, 2023. 2
- [5] Holger Caesar, Varun Bankiti, Alex Lang, Sourabh Vora, Venice Liong, Qiang Xu, Anush Krishnan, Yu Pan, Giancarlo Baldan, and Oscar Beijbom. nuScenes: A multimodal dataset for autonomous driving. In *CVPR*, 2020. 2, 3, 4
- [6] Angel Chang, Thomas Funkhouser, Leonidas Guibas, Pat Hanrahan, Qixing Huang, Zimo Li, Silvio Savarese, Manolis Savva, Shuran Song, Hao Su, Jianxiong Xiao, Li Yi, and Fisher Yu. Shapenet: An information-rich 3D model repository. *arXiv preprint arXiv:1512.03012*, 2015. 2, 3, 4
- [7] Marius Cordts, Mohamed Omran, Sebastian Ramos, Timo Rehfeld, Markus Enzweiler, Rodrigo Benenson, Uwe Franke, Stefan Roth, and Bernt Schiele. The cityscapes dataset for semantic urban scene understanding. In *CVPR*, 2016. 2, 3, 4
- [8] Angela Dai, Angel Chang, Manolis Savva, Maciej Halber, Thomas Funkhouser, and Matthias Nießner. ScanNet: Richly-annotated 3D reconstructions of indoor scenes. In *TPAMI*, 2017. 2, 3, 4
- [9] Johan Edstedt, Ioannis Athanasiadis, Mårten Wadenbäck, and Michael Felsberg. DKM: Dense kernelized feature matching for geometry estimation. In *CVPR*, 2023. 5
- [10] Simon Fuhrmann, Fabian Langguth, and Michael Goesele. Mve-a multi-view reconstruction environment. In *GCH*, 2014. 2, 3, 4
- [11] Andreas Geiger, Philip Lenz, Christoph Stiller, and Raquel Urtasun. Vision meets robotics: The KITTI dataset. *IJRR*, 2013. 2, 3, 4
- [12] Yannick Hold-Geoffroy, Kalyan Sunkavalli, Jonathan Eisenmann, Matthew Fisher, Emiliano Gambaretto, Sunil Hadap, and Jean-François Lalonde. A perceptual measure for deep single image camera calibration. In *CVPR*, 2018. 2, 3
- [13] Linyi Jin, Jianming Zhang, Yannick Hold-Geoffroy, Oliver Wang, Kevin Blackburn-Matzen, Matthew Sticha, and David F Fouhey. Perspective fields for single image camera calibration. In *CVPR*, 2023. 2, 3, 4
- [14] Hyunjoon Lee, Eli Shechtman, Jue Wang, and Seungyong Lee. Automatic upright adjustment of photographs with robust camera calibration. *TPAMI*, 2013. 2, 3
- [15] Jinwoo Lee, Hyunsung Go, Hyunjoon Lee, Sunghyun Cho, Minhyuk Sung, and Junho Kim. Ctrl-C: Camera calibration transformer with line-classification. In *ICCV*, 2021. 2, 3
- [16] Zhengqi Li and Noah Snavely. MegaDepth: Learning single-view depth prediction from internet photos. In *CVPR*, 2018. 2, 3, 4
- [17] Nathan Silberman, Derek Hoiem, Pushmeet Kohli, and Rob Fergus. Indoor segmentation and support inference from rgb-d images. *ECCV*, 2012. 2, 3, 4
- [18] Jürgen Sturm, Nikolas Engelhard, Felix Endres, Wolfram Burgard, and Daniel Cremers. A benchmark for the evaluation of RGBD SLAM systems. In *IROS*, 2012. 2, 3, 4
- [19] Jiaming Sun, Zehong Shen, Yuang Wang, Hujun Bao, and Xiaowei Zhou. LoFTR: Detector-free local feature matching with transformers. In *CVPR*, 2021. 5
- [20] Pei Sun, Henrik Kretschmar, Xerxes Dotiwalla, Aurelien Chouard, Vijaysai Patnaik, Paul Tsui, James Guo, Yin Zhou, Yuning Chai, Benjamin Caine, Vijay Vasudevan, Wei Han, Jiquan Ngiam, Hang Zhao, Aleksei Timofeev, Scott Ettinger, Maxim Krivokon, Amy Gao, Aditya Joshi, Yu Zhang, Jonathon Shlens, Zhifeng Chen, and Dragomir Anguelov. Scalability in perception for autonomous driving: Waymo open dataset. In *CVPR*, 2020. 2, 3, 4
- [21] Daniel Maximilian Swoboda. A comprehensive characterization of the asus xtion pro depth sensor. In *European Conference on Educational Robotics*, page 3, 2014. 2
- [22] Zachary Teed and Jia Deng. DeepV2D: Video to depth with differentiable structure from motion. In *ICLR*, 2020. 2
- [23] Xingkui Wei, Yinda Zhang, Zhuwen Li, Yanwei Fu, and Xiangyang Xue. DeepSFM: Structure from motion via deep bundle adjustment. In *ECCV*, 2020. 1, 2, 3
- [24] Jianxiong Xiao, Andrew Owens, and Antonio Torralba. Sun3D: A database of big spaces reconstructed using SFM and object labels. In *ICCV*, 2013. 2, 3, 4
- [25] Xianggang Yu, Mutian Xu, Yidan Zhang, Haolin Liu, Chongjie Ye, Yushuang Wu, Zizheng Yan, Chenming Zhu, Zhangyang Xiong, Tianyou Liang, Guanying Chen, Shuguang Cui, and Xiaoguang Han. MVImgNet: A large-scale dataset of multi-view images. In *CVPR*, 2023. 2, 3, 4

- [26] Zhengyou Zhang. Microsoft kinect sensor and its effect. *IEEE multimedia*, 19(2):4–10, 2012. 2
- [27] Shengjie Zhu and Xiaoming Liu. PMatch: Paired masked image modeling for dense geometric matching. In *CVPR*, 2023. 2, 5
